# Supplementary material for: Tailored synthesis of nonlinear optical quaternary chalcohalides: Ba4Ge3S9Cl2, Ba4Si3Se9Cl2 and Ba4Ge3Se9Cl2
Source: Royal Society of Chemistry journal article supplement (doi:10.1039/c6dt04294e), 2017-01-01
Supplement: c6dt04294e1.pdf [file c6dt04294e1.pdf]

## Electronic Supplementary Information

# Tailored Synthesis of Nonlinear Optical Quaternary Chalcogenides: $\text{Ba}_4\text{Ge}_3\text{S}_9\text{Cl}_2$ , $\text{Ba}_4\text{Si}_3\text{Se}_9\text{Cl}_2$ and $\text{Ba}_4\text{Ge}_3\text{Se}_9\text{Cl}_2$

Peng-Fei Liu,<sup>a,b</sup> Yan-Yan Li,<sup>a</sup> Yu-Jun Zheng,<sup>a,b</sup> Ju-Song Yu,<sup>a,b</sup> Rui-  
Huan Duan,<sup>a,b</sup> Hong Chen,<sup>a</sup> Hua Lin,<sup>a</sup> Ling Chen<sup>a</sup> and Li-Ming Wu<sup>\*,a</sup>

*<sup>a</sup>State Key Laboratory of Structural Chemistry, Fujian Institute of  
Research on the Structure of Matter, Chinese Academy of Sciences,  
Fuzhou, Fujian 350002, People's Republic of China*

*<sup>b</sup>University of Chinese Academy of Sciences, Beijing 100039,  
People's Republic of China*

## SURPOTING INFORMATION

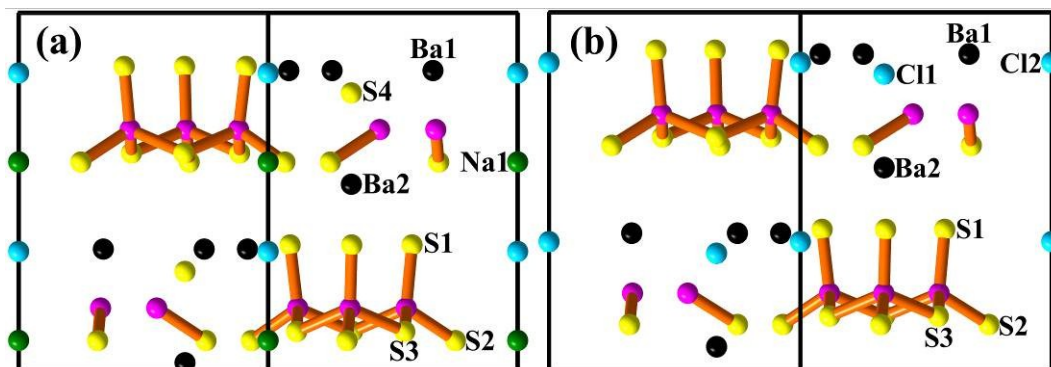

Figure S1a. Crystal structure of (a)  $\text{NaBa}_4\text{Ge}_3\text{S}_{10}\text{Cl}$  and (b)  $\text{Ba}_4\text{Ge}_3\text{S}_9\text{Cl}_2$  viewed along the  $[110]$  direction.

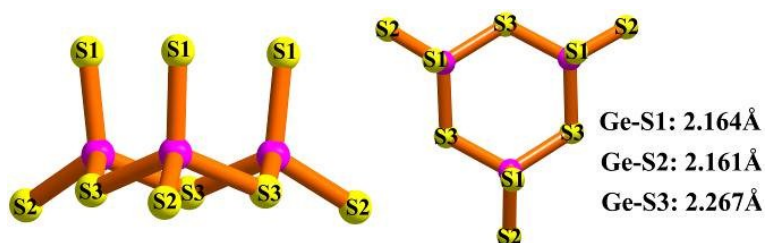

Figure S1b. The fundamental  $[\text{Ge}_3\text{S}_9]$  ring viewed along the side and top direction with bond lengths.

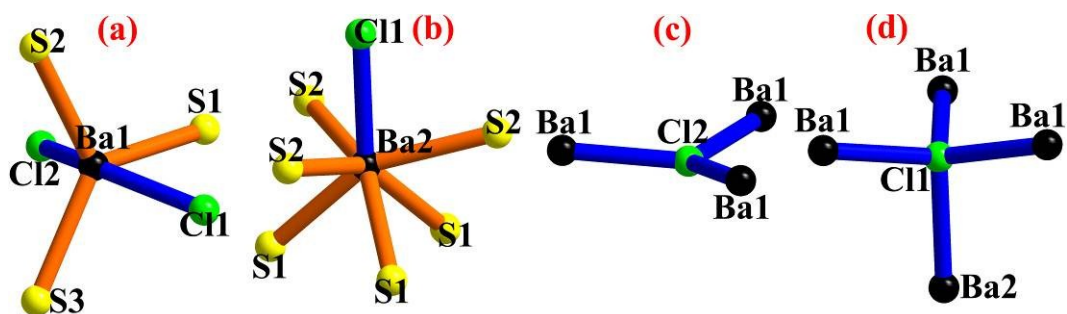

Figure S1c. Coordination environments of Ba and Cl atoms in  $\text{Ba}_4\text{Ge}_3\text{S}_9\text{Cl}_2$ . (a) Ba1 atoms. (b) Ba2 atoms. (c) Cl2 atoms. (d) Cl1 atoms.

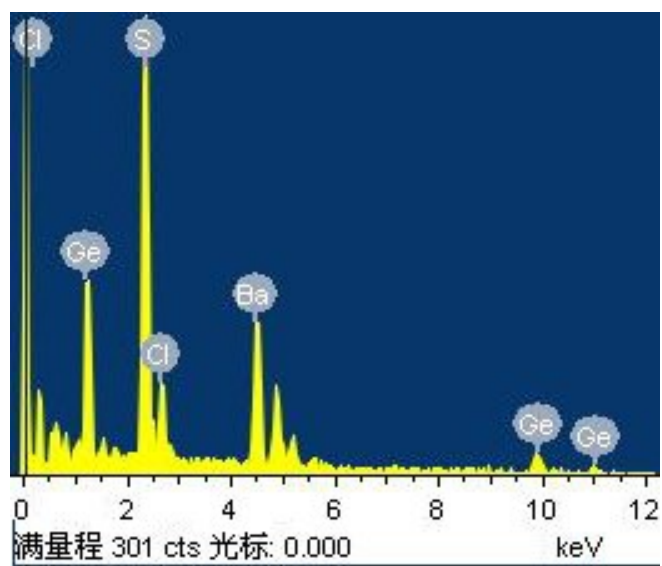

Figure S2a. The EDX spectrum of  $\text{Ba}_4\text{Ge}_3\text{S}_9\text{Cl}_2$ .

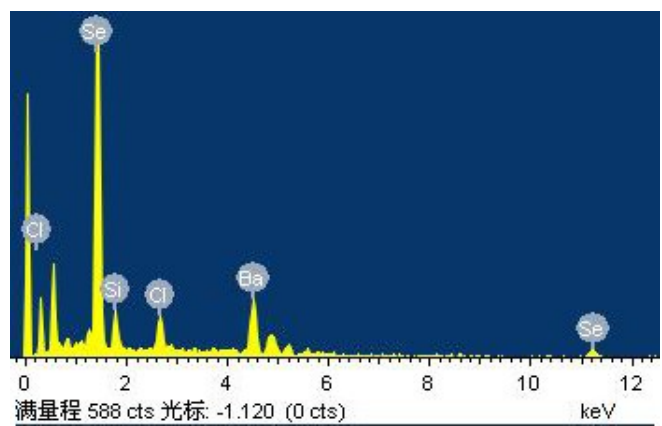

Figure S2b. The EDX spectrum of  $\text{Ba}_4\text{Si}_3\text{Se}_9\text{Cl}_2$ .

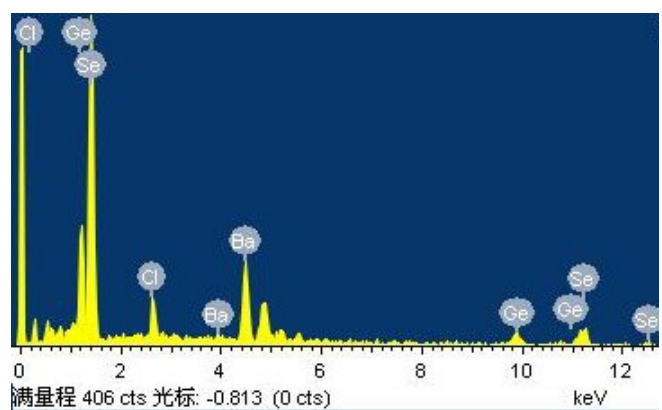

Figure S2c. The EDX spectrum of  $\text{Ba}_4\text{Ge}_3\text{Se}_9\text{Cl}_2$ .

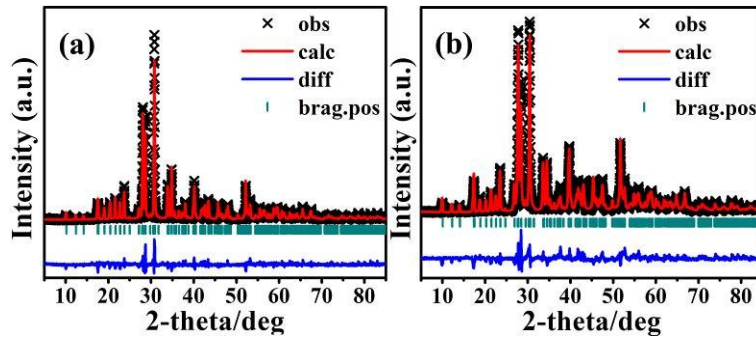

Figure S3. Experimental powder XRD ( $\times$ ), the calculated (red solid line) and difference (blue solid line) results of the fullprof refinements for (a)  $\text{Ba}_4\text{Si}_3\text{Se}_9\text{Cl}_2$  and (b)  $\text{Ba}_4\text{Ge}_3\text{Se}_9\text{Cl}_2$ .

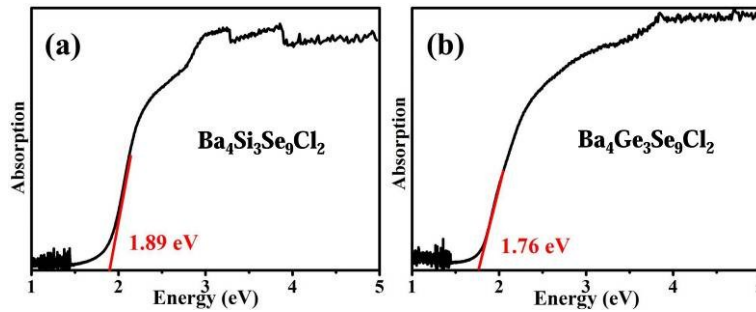

Figure S4. UV-vis diffuse-reflectance spectra of (a)  $\text{Ba}_4\text{Si}_3\text{Se}_9\text{Cl}_2$  and (b)  $\text{Ba}_4\text{Ge}_3\text{Se}_9\text{Cl}_2$ .

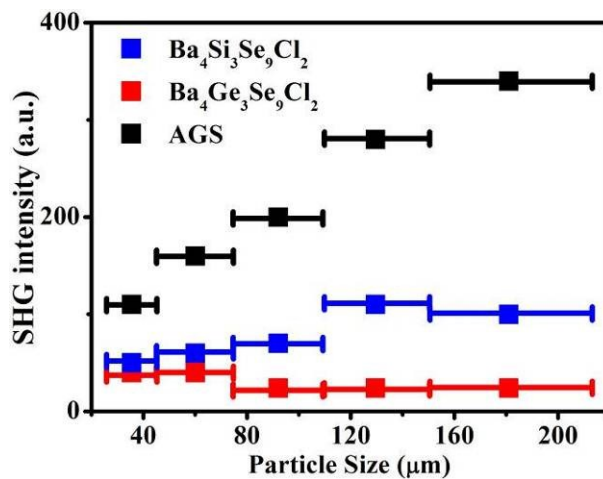

Figure S5. Phase-matching curves, i.e. particle size versus SHG response, for  $\text{Ba}_4\text{Si}_3\text{Se}_9\text{Cl}_2$ ,  $\text{Ba}_4\text{Ge}_3\text{Se}_9\text{Cl}_2$  and  $\text{AgGaS}_2$  (as reference).

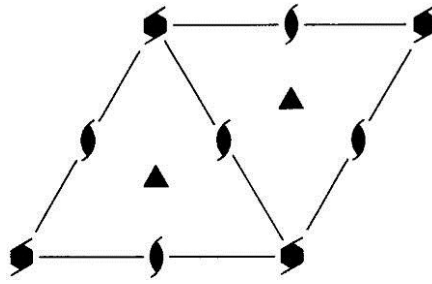

Figure S6. The diagram of symmetry elements of the hexagonal space group  $P6_3$  (no. 173).
